# Supplementary material for: Genetic lineage tracing identifies in situ Kit-expressing cardiomyocytes
Source: PubMed Central journal article supplement — Cell Res. 2015 Dec 4;26(1):119–30. doi: 10.1038/cr.2015.143 (PMC4816131; doi:10.1038/cr.2015.143), 2015-12-04
Supplement: cr2015143x1.pdf [file cr2015143x1.pdf]

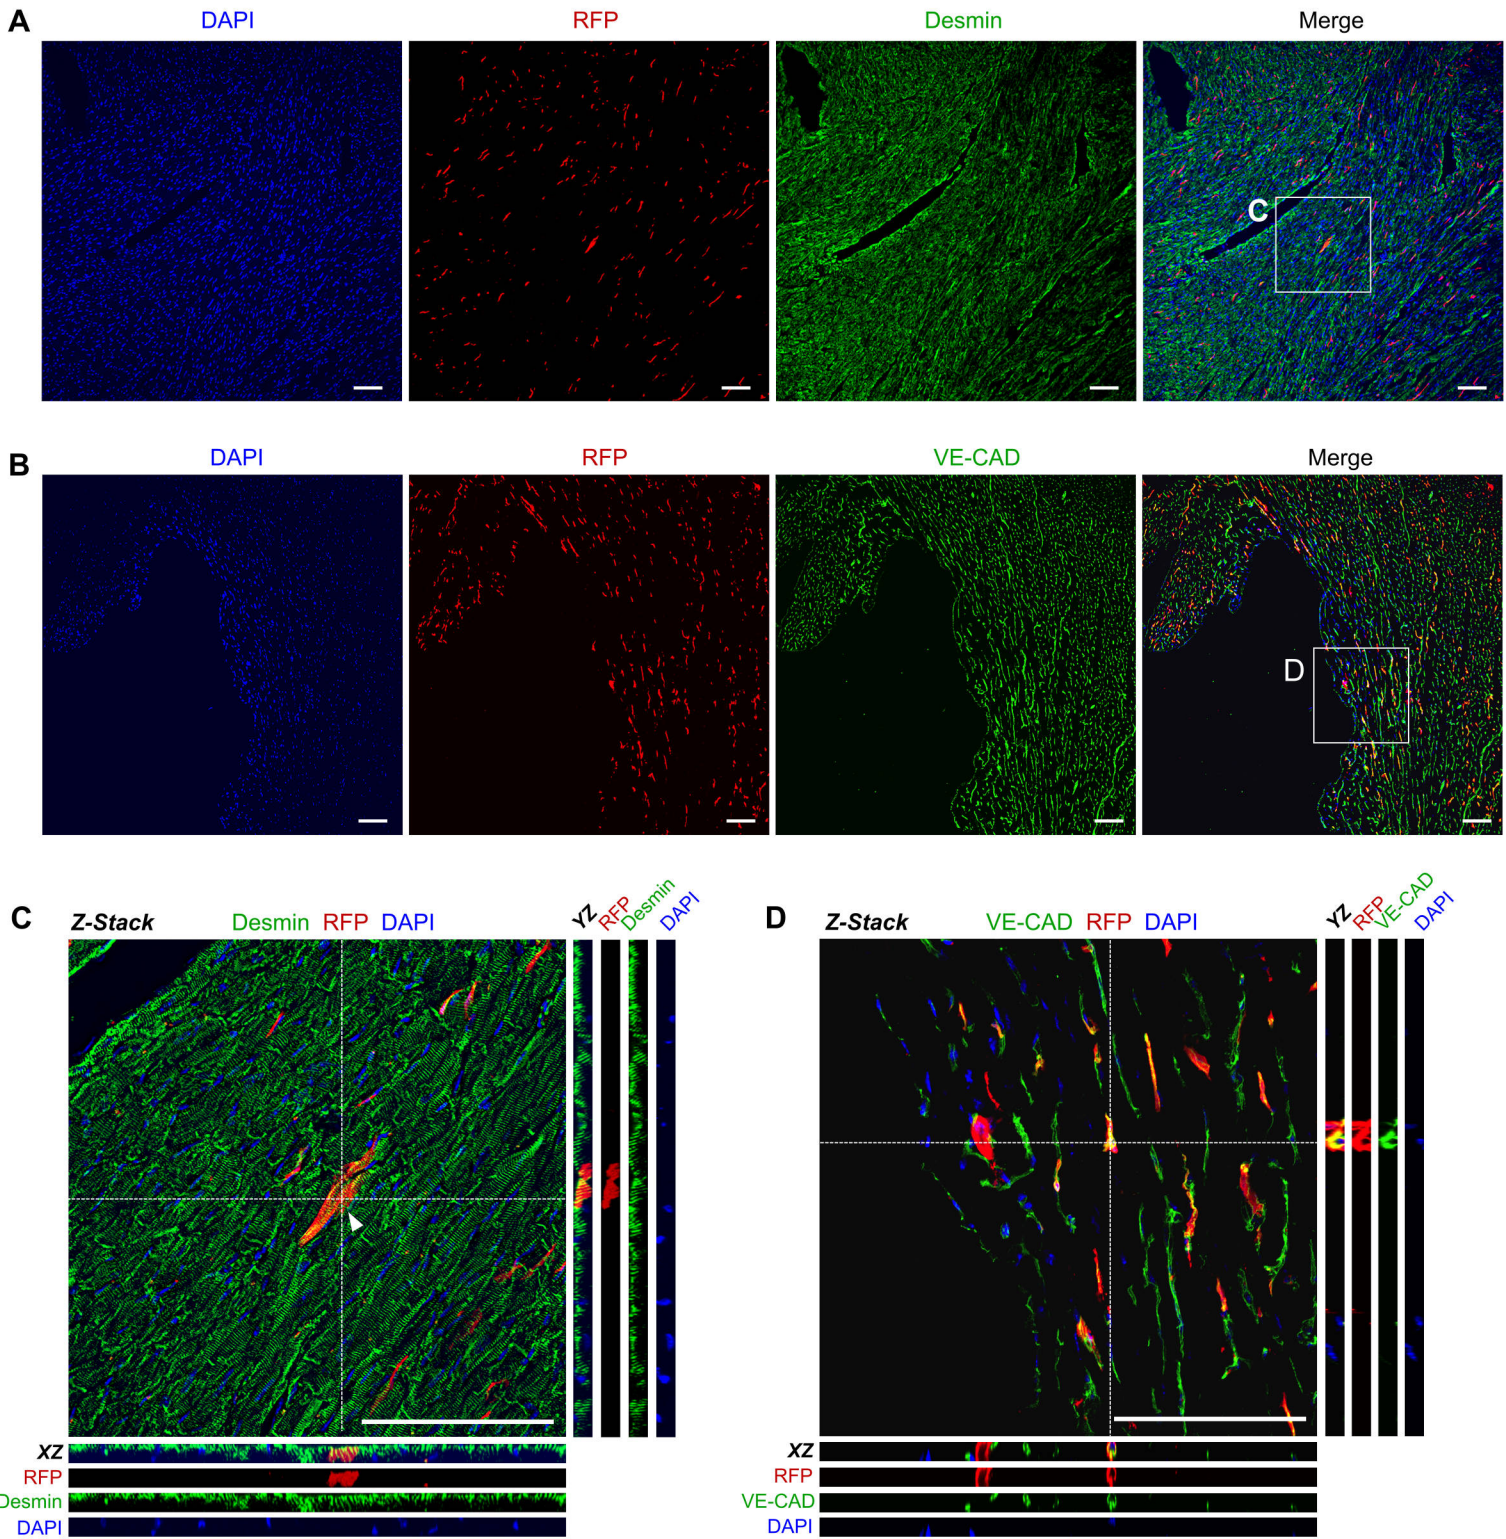

**Supplementary information, Figure S1** *Kit*<sup>+</sup> cells contributes to cardiomyocytes and endothelial cells in homeostasis. **(A,B)** Immunostaining of RFP and Desmin or VE-CAD on heart sections from *Kit-CreER;Rosa26-RFP* mice after sham operation. **(C,D)** Z-stack confocal images showing signals on XZ or YZ axes with both merged and split fluorescence channels. Scale bars, 100  $\mu$ m.
