# Supplementary material for: Genetic lineage tracing identifies in situ Kit-expressing cardiomyocytes
Source: PubMed Central journal article supplement — Cell Res. 2015 Dec 4;26(1):119–30. doi: 10.1038/cr.2015.143 (PMC4816131; doi:10.1038/cr.2015.143), 2015-12-04
Supplement: cr2015143x2.pdf [file cr2015143x2.pdf]

**A**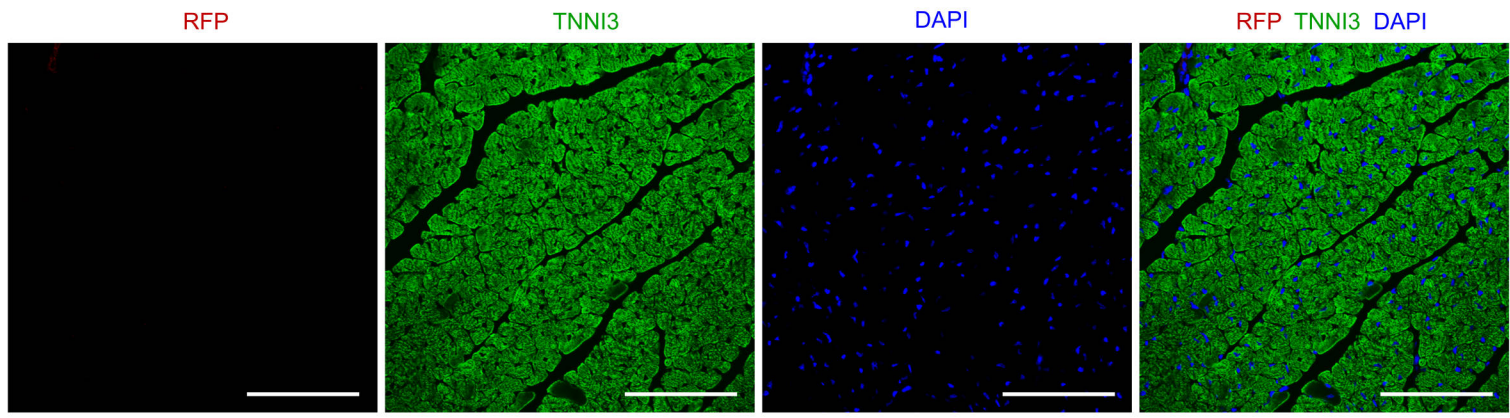

**Supplementary information Figure S2** No cardiomyocytes were labeled by RFP without tamoxifen induction. **(A)** Immunostaining for RFP and TNNI3 on heart sections from *Kit-CreER;Rosa26-RFP* mice that received no tamoxifen during homeostasis. Scale bars, 100 μm.
