# Supplementary material for: Genetic lineage tracing identifies in situ Kit-expressing cardiomyocytes
Source: PubMed Central journal article supplement — Cell Res. 2015 Dec 4;26(1):119–30. doi: 10.1038/cr.2015.143 (PMC4816131; doi:10.1038/cr.2015.143), 2015-12-04
Supplement: cr2015143x4.pdf [file cr2015143x4.pdf]

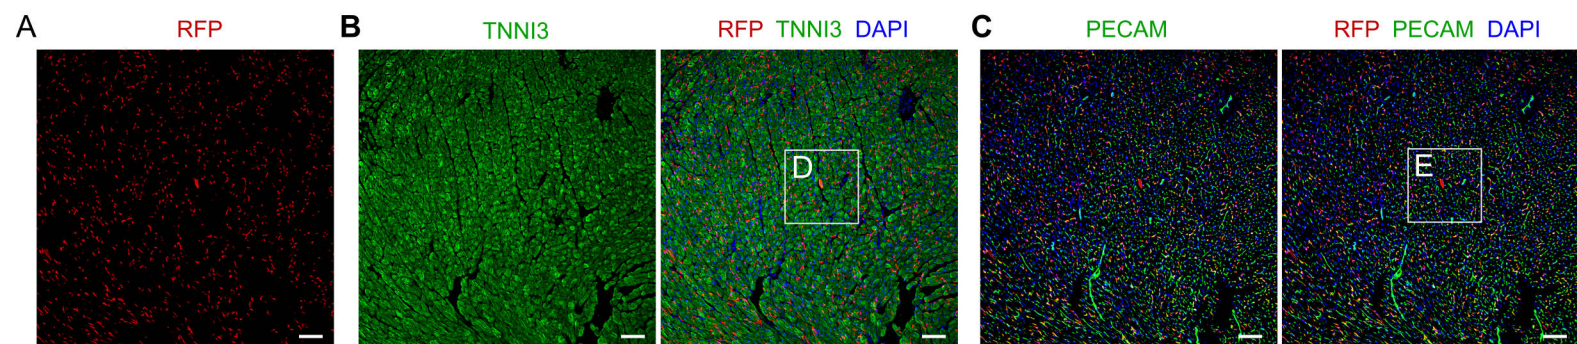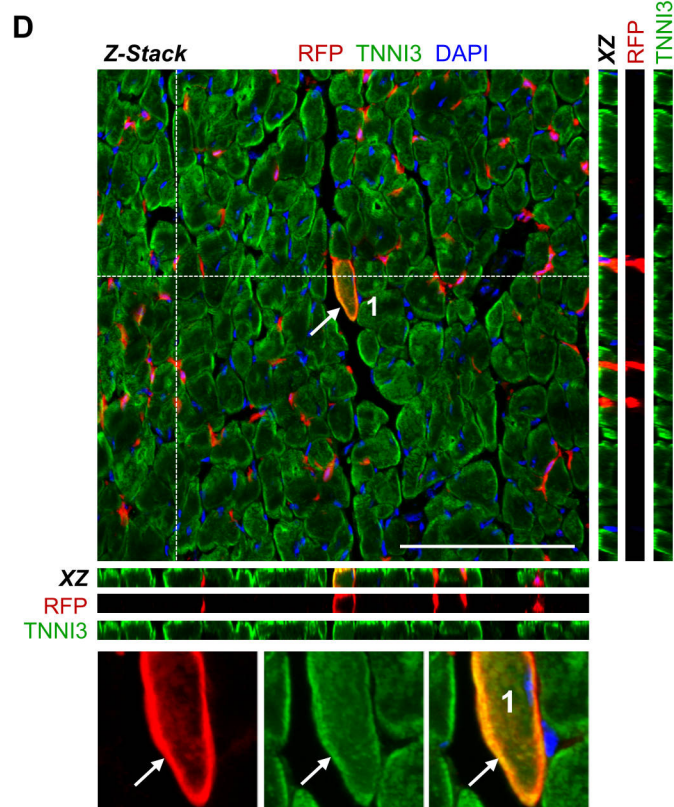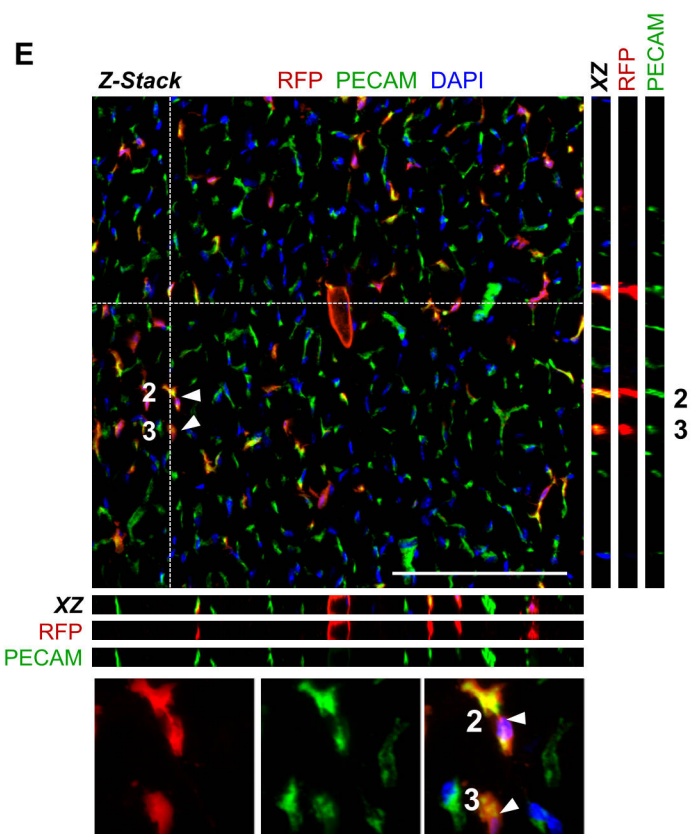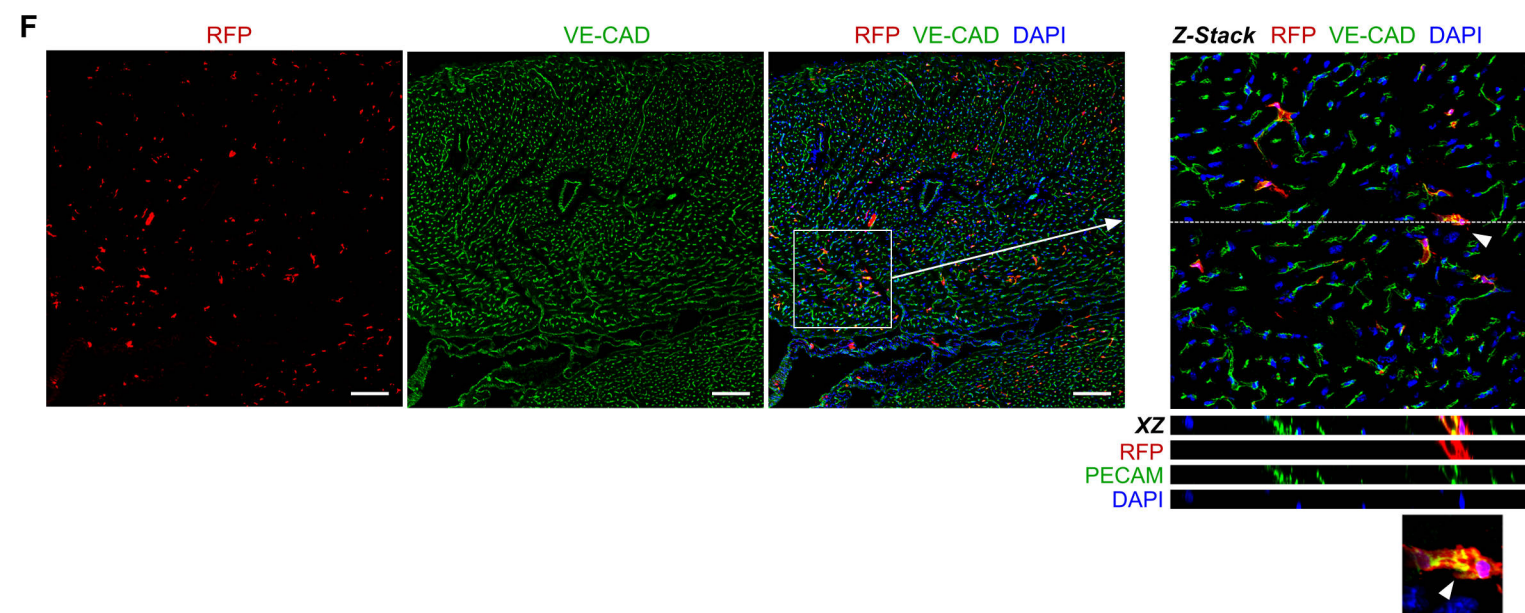

**Supplementary information, Figure S4** *Kit*<sup>+</sup> cell fates in remote zone of infarcted heart. **(A-C)** Immunostaining for RFP, TNNI3 and PECAM on *Kit-CreER; Rosa26-RFP* heart sections. Boxed regions are magnified in D and E. **(D,E)** Z-stack confocal images including XZ and YZ scanned sections showed RFP+TNNI3<sup>+</sup> cells (arrows, **D**) and RFP+PECAM<sup>+</sup> cells (arrowheads, **E**). **(F)** Immunostaining of RFP and VE-CAD showed RFP+VE-CAD<sup>+</sup> endothelial cells (arrowheads).
