# Supplementary material for: Genetic lineage tracing identifies in situ Kit-expressing cardiomyocytes
Source: PubMed Central journal article supplement — Cell Res. 2015 Dec 4;26(1):119–30. doi: 10.1038/cr.2015.143 (PMC4816131; doi:10.1038/cr.2015.143), 2015-12-04
Supplement: cr2015143x5.pdf [file cr2015143x5.pdf]

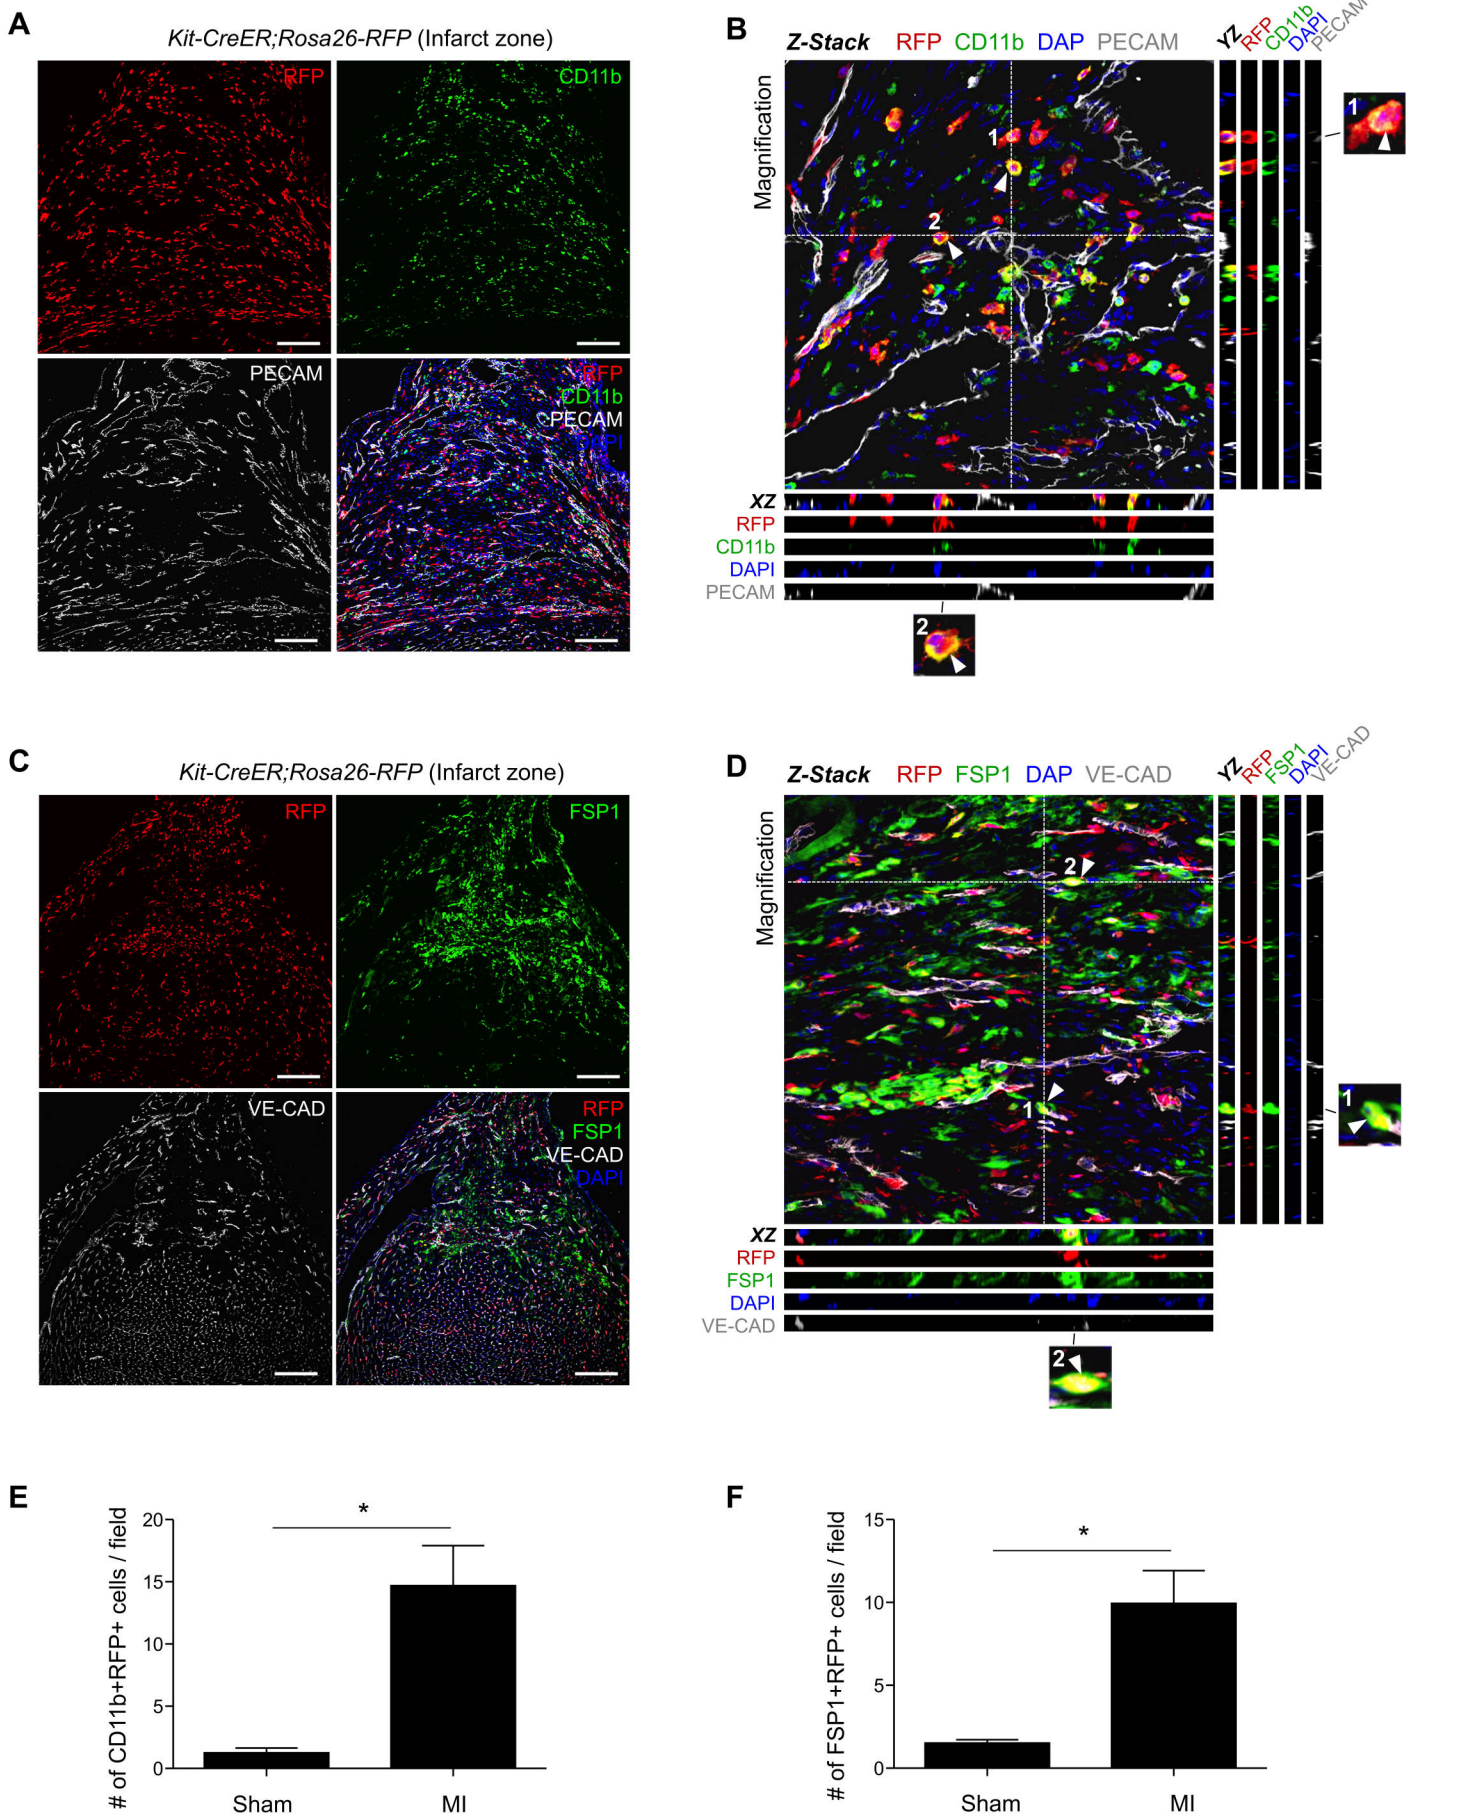

**Supplementary information, Figure S5** *Kit*<sup>+</sup> cells contribute to CD11b<sup>+</sup> and FSP1<sup>+</sup> cells. **(A,B)** Immunostaining of RFP, CD11b and PECAM on *Kit-CreER;Rosa26-RFP* heart sections after MI. Z-stack confocal images showing signals on both XZ and YZ axes (dotted line) with merged and split channels for fluorescence. Arrowheads in 1 and 2 are RFP+CD11b<sup>+</sup> cells. **(C,D)** Immunostaining of RFP, FSP1 and VE-CAD on *Kit-CreER;Rosa26-RFP* heart sections after MI. Z-stack confocal images showing signals on both XZ and YZ axes (dotted line) with merged and split channels for fluorescence. Arrowheads in 1 and 2 are RFP+FSP1<sup>+</sup> cells. **(E,F)** Quantification of number of CD11b<sup>+</sup>+RFP<sup>+</sup> or FSP1<sup>+</sup>+RFP<sup>+</sup> cells in sham and MI hearts. Images of 40x field in the infarcted regions were taken for quantification. \**P* < 0.05; *n* = 4 for each group. Scale bars, 100 μm.
