# Supplementary material for: Genetic lineage tracing identifies in situ Kit-expressing cardiomyocytes
Source: PubMed Central journal article supplement — Cell Res. 2015 Dec 4;26(1):119–30. doi: 10.1038/cr.2015.143 (PMC4816131; doi:10.1038/cr.2015.143), 2015-12-04
Supplement: cr2015143x6.pdf [file cr2015143x6.pdf]

**A**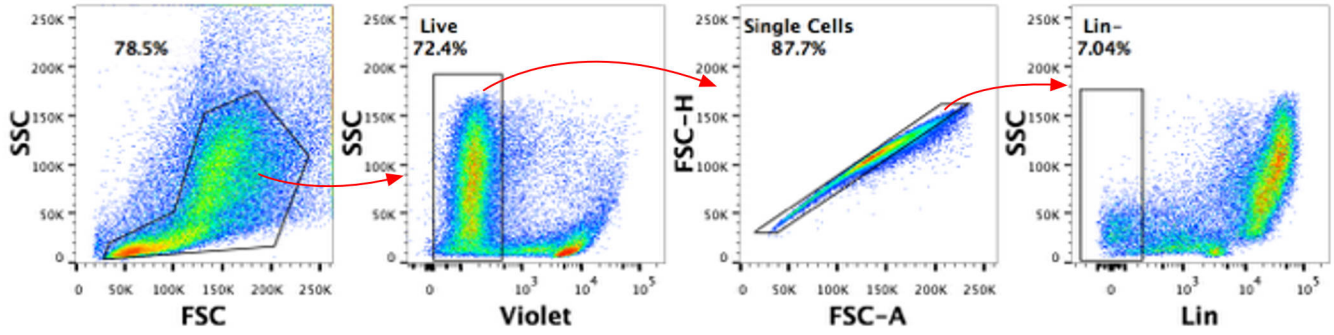**B**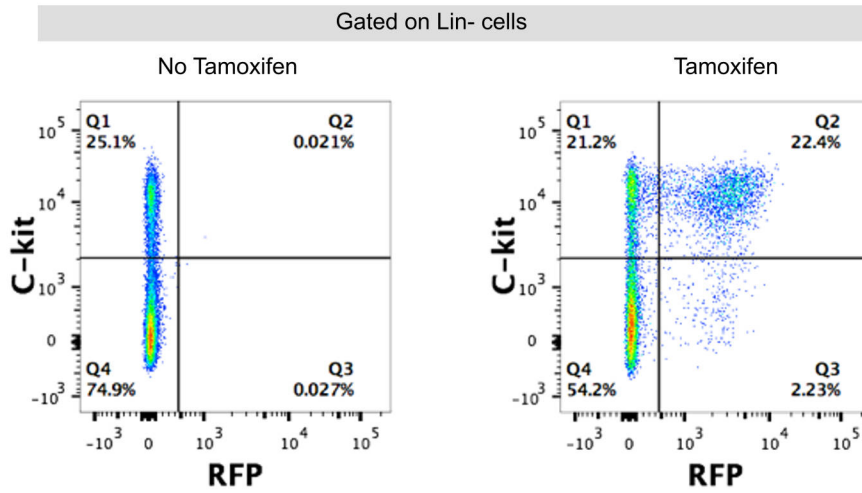

**Supplementary information, Figure S6** Labeling efficiency and specificity of *Kit-CreER*. **(A)** Gating strategy of lineage negative (Lin<sup>-</sup>) cells from bone marrow of *Kit-CreER; Rosa26-RFP* mice. **(B)** Flow cytometry analysis of c-Kit<sup>+</sup> and RFP<sup>+</sup> populations gated on Lin<sup>-</sup> cells. After one pulse tamoxifen induction, Kit-CreER labels over 50% c-Kit<sup>+</sup> cells (efficiency), and over 90% Kit-CreER labeled cells are c-Kit<sup>+</sup> (specificity).
